# Supplementary material for: Nomenclature and diagnosis of seronegative coeliac disease and chronic non-coeliac enteropathies in adults: the Paris consensus
Source: HighWire-hosted journal article supplement (doi:10.1136/gutjnl-2021-326645), 2022-06-08
Supplement: gutjnl-2021-326645supp001_data_supplement.pdf [file gutjnl-2021-326645supp001_data_supplement.pdf]

| Type of enteropathy                                    | Clinical and laboratory features                                                                                                                | Histological/molecular features on duodenal biopsy                                                                          | Diagnostic tests                                                                                      |
|--------------------------------------------------------|-------------------------------------------------------------------------------------------------------------------------------------------------|-----------------------------------------------------------------------------------------------------------------------------|-------------------------------------------------------------------------------------------------------|
| <b>Whipple's disease [27]</b>                          | Long-lasting history of seronegative migratory arthritis, fever, severe malabsorption, neurological involvement in middle aged Caucasians       | PAS+ macrophages infiltrating the <i>lamina propria</i>                                                                     | Duodenal biopsy; positive PCR for <i>Tropheryma whipplei</i>                                          |
| <b>Tuberculosis [28]</b>                               | Cough, ascites, fever, night sweats                                                                                                             | Granulomas                                                                                                                  | Mantoux tuberculin skin test; interferon-gamma release assay; ascitic fluid analysis; chest X-ray; CT |
| <b>Small intestinal bacterial overgrowth [29]</b>      | Malabsorption syndrome of different severity in patients with predisposing conditions*                                                          | Variable degrees of villous blunting, if present; intraepithelial lymphocytosis                                             | H <sub>2</sub> -glucose breath test, duodenal/jejunal aspirate                                        |
| <b>Collagenous sprue [30,31]</b>                       | Severe malabsorption, abdominal pain; in some cases suggestive history for CD or TS or ARBs therapy                                             | band of sub-epithelial collagen (usually >20 µm)                                                                            | Duodenal biopsy                                                                                       |
| <b>Enteropathy associated with IPSID [32]</b>          | Malabsorption syndrome of different severity in young adults living in lower socioeconomic areas and in the Middle East, Far East and Africa    | plasmacytic infiltrate of CD20+ B-cells and plasma cells expressing the alpha heavy chain but no light chains               | Full-thickness intestinal biopsy; abdomen CT;                                                         |
| <b>Environmental/tropical enteropathy [33]**</b>       | Poorly understood condition ranging in severity from subclinical to frank malabsorption in people living in rural areas of developing Countries | Variable degrees of villous blunting and T-cell infiltration                                                                | Duodenal biopsy                                                                                       |
| <b>Enteropathy associated with mefenamic acid [34]</b> | Diarrhoea and malabsorption + suggestive pharmacological history                                                                                | Variable degrees of villous blunting and mixed inflammatory infiltrate of the <i>lamina propria</i> , including eosinophils | Duodenal biopsy and drug withdrawal                                                                   |

**Table 1 Supplementary.** List of enteropathies with villous atrophy and negative coeliac serology for which the threshold of agreement (70%) was not reached to be assigned to the diagnostic categories shown in Table 1.

IPSID: immunoproliferative small intestinal disease; CT: computed tomography; PCR: polymerase chain reaction; ARBs: angiotensin II receptors blockers;

\*disorders of protective antibacterial mechanisms of the gastro-intestinal tract (e.g. achlorhydria, pancreatic exocrine insufficiency, primary or secondary immunodeficiency), anatomical abnormalities (e.g. previous ileo-caecal resections, gastrectomy, diverticula, fistulae, surgical blind loop, small intestinal obstruction) and/or motility disorders (e.g. scleroderma, autonomic neuropathy in diabetes mellitus, post-radiation enteropathy, small intestinal pseudo-obstruction) [110]

\*\*Also known as tropical enteropathy
